# Supplementary material
Source: PubMed Central journal article supplement (PMC5079111)
Supplement: NIHMS821453-supplement-6.pdf [file NIHMS821453-supplement-6.pdf]

**A**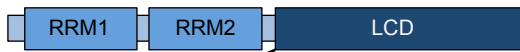

MASASSSQ**RGR**SGSGN**FGGGRGGGF**GGND**DFGRGGNF**SGRGG**FGGSRGGGY**GGSG**DYNGF**GN**DGSNFGGG**  
 SY**NDFGN**YNNQSS**NFGPMKGGNF**GGRSSGP**YGGGGQYFAKPR**NQGG**YGGSSSSSYGSGRRF**

**B**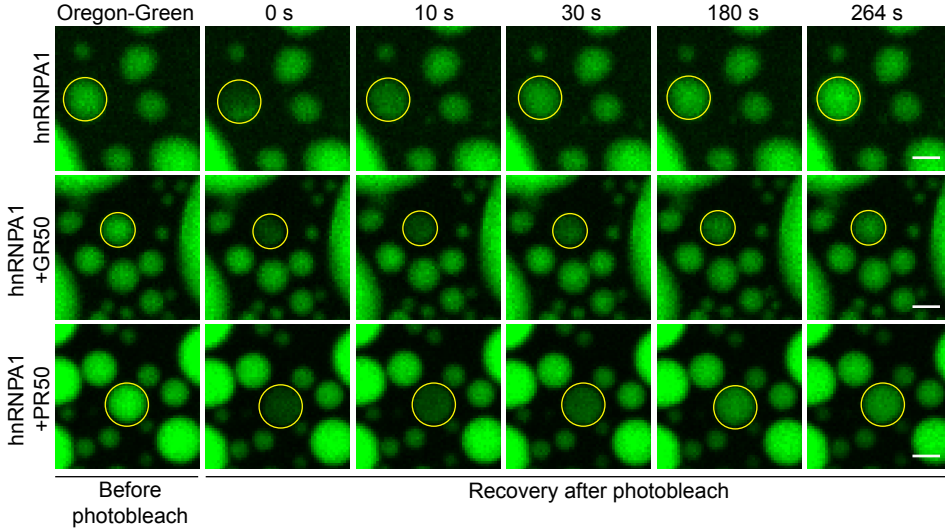**C**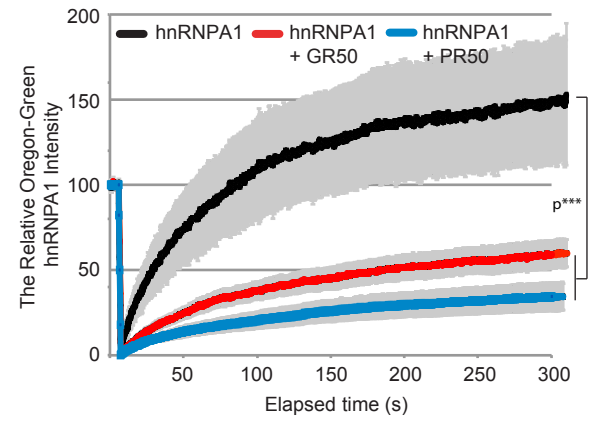**D**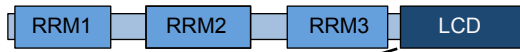

MINPVQQQNQIG**YPQPYGQWGWY**GNAQQIG**QYMPNGWQVPAY**GM**YGQAWN**QQ**GFNQ**TQSSAP**WMG**  
 P**NYGVQ**PPQ**QNGSMLPNQ**PSG**YRVAGYE**TQ

**E**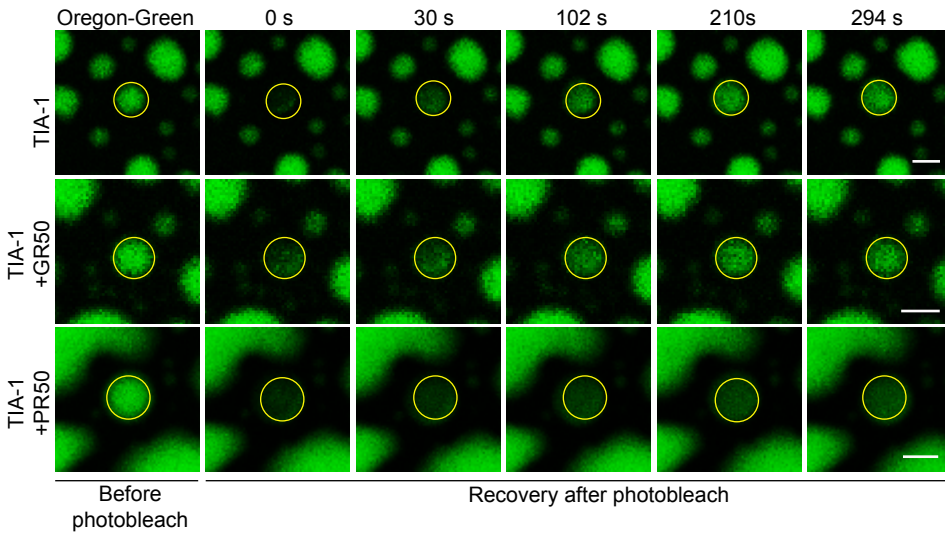**F**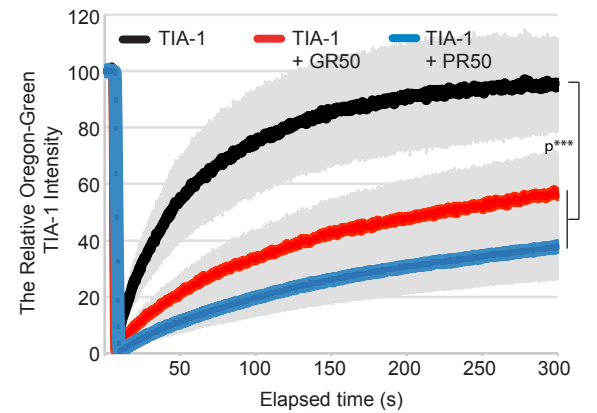

Supplementary Figure S6
