# Supplementary material
Source: PubMed Central journal article supplement (PMC5079111)

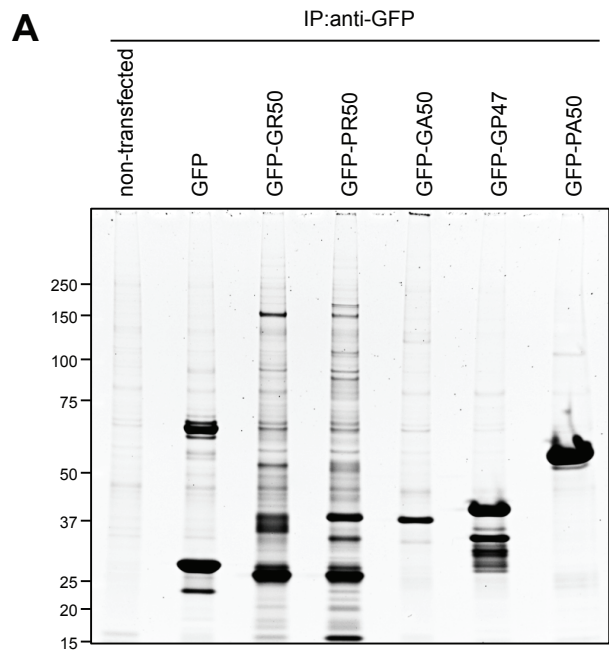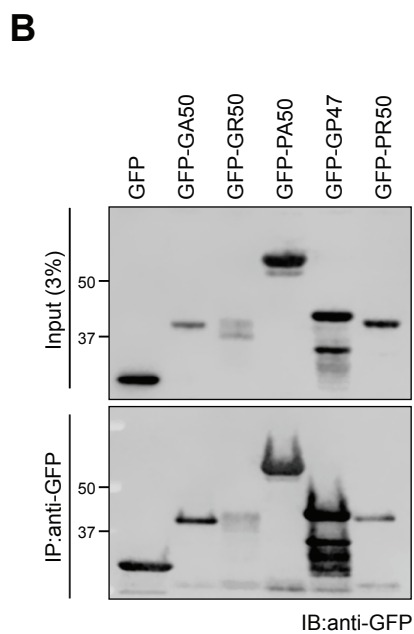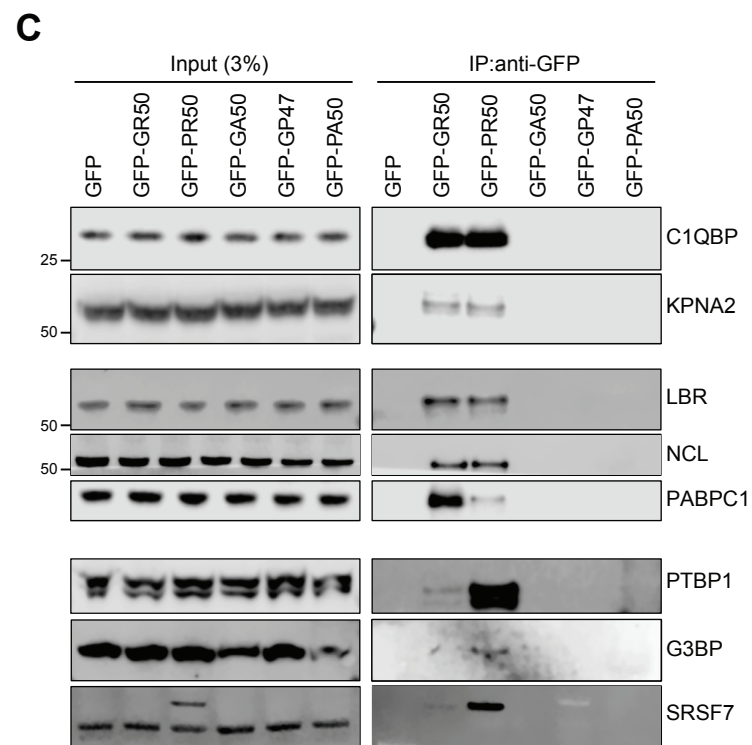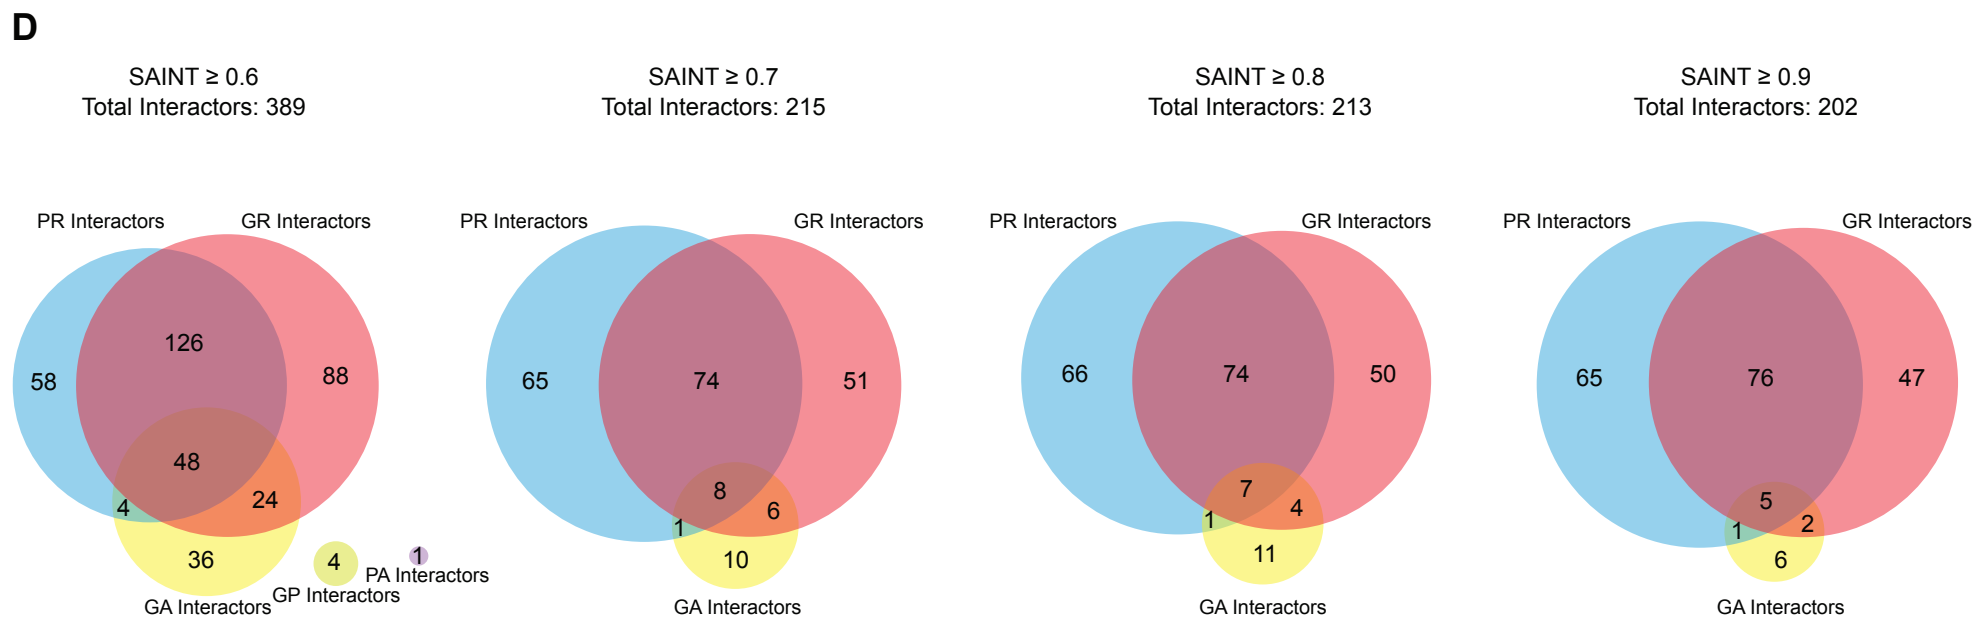

Supplementary Figure S1

Supplement: NIHMS821453-supplement-1.pdf [file NIHMS821453-supplement-1.pdf]

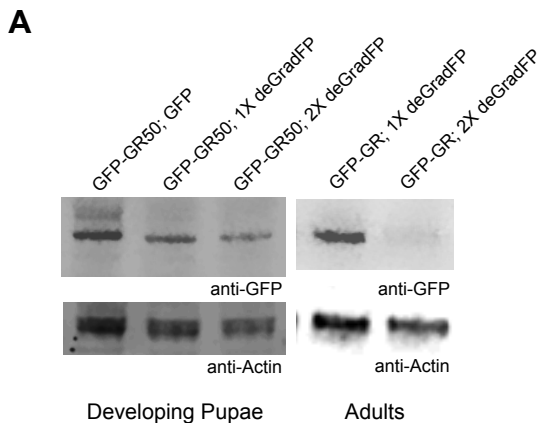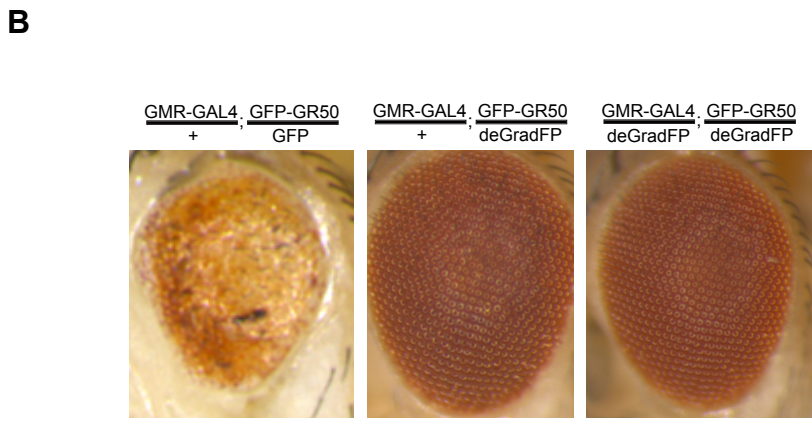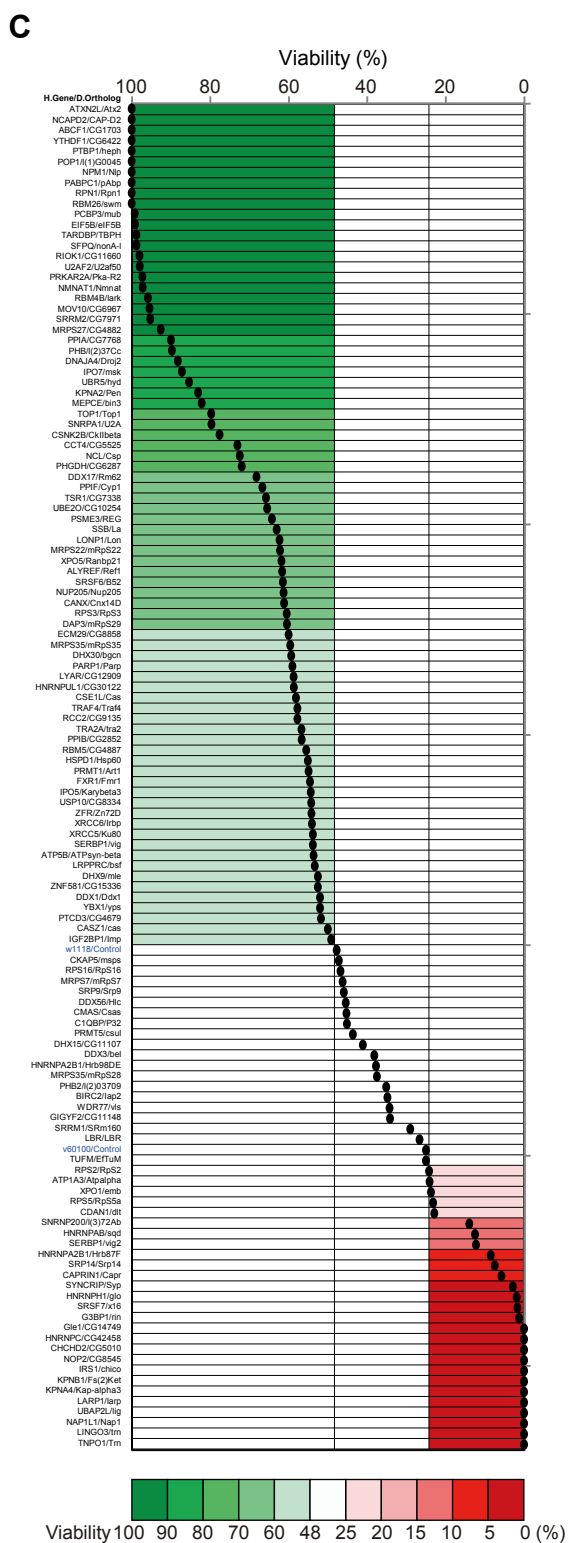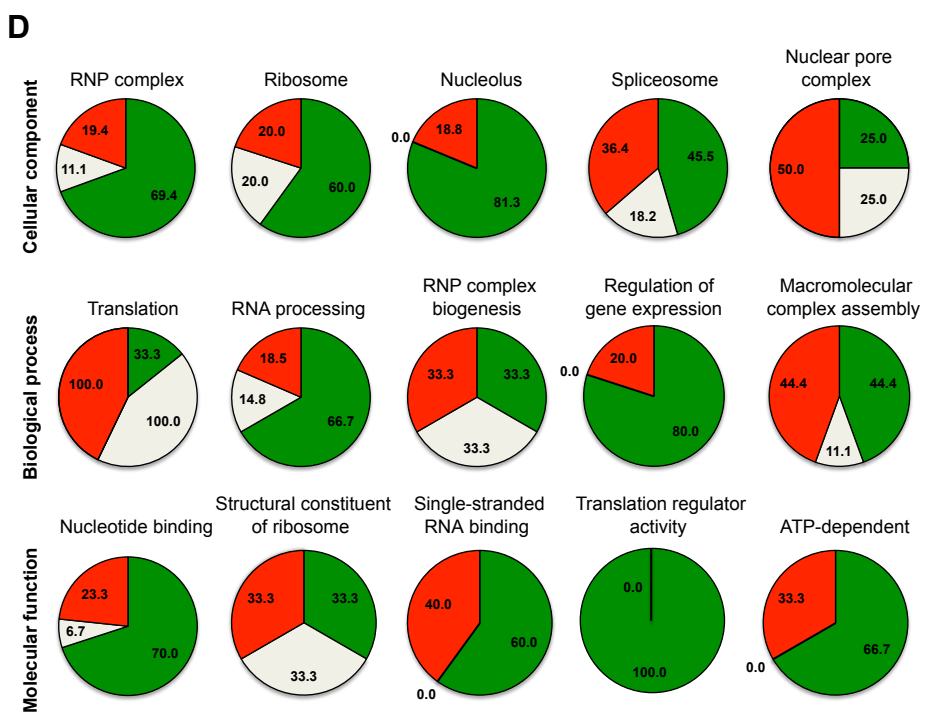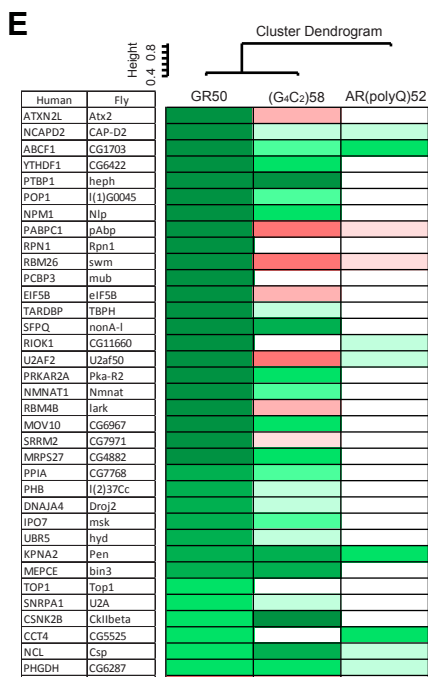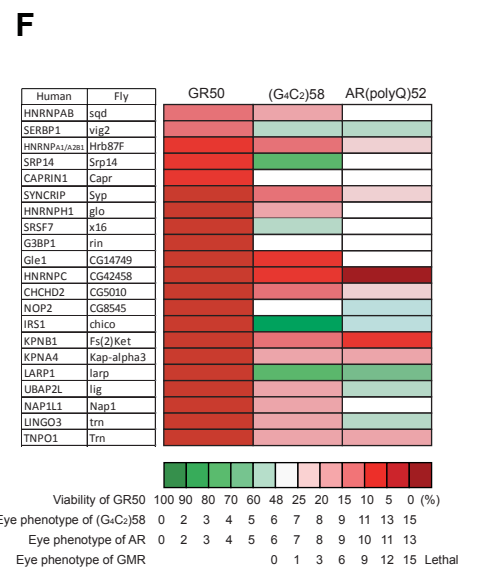

Supplementary Figure S2

Supplement: NIHMS821453-supplement-2.pdf [file NIHMS821453-supplement-2.pdf]

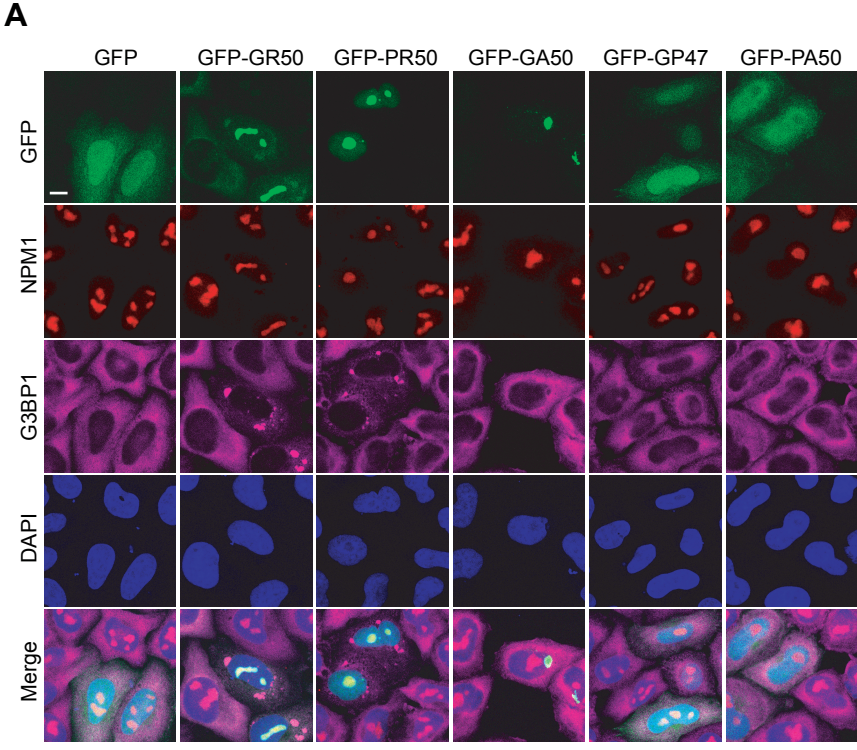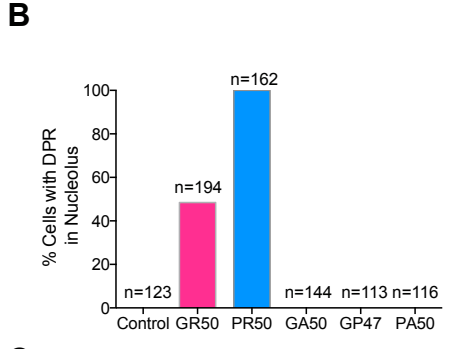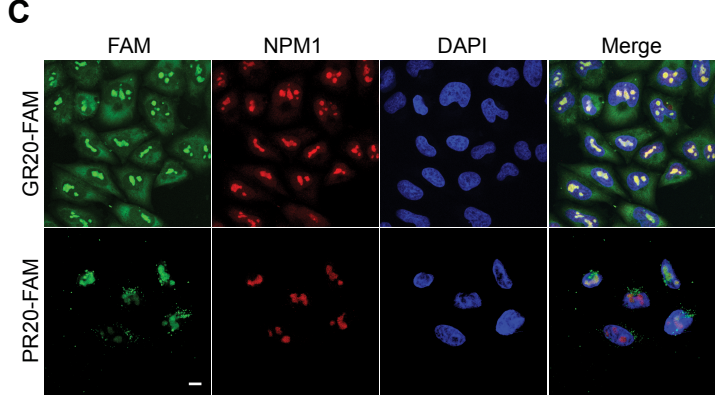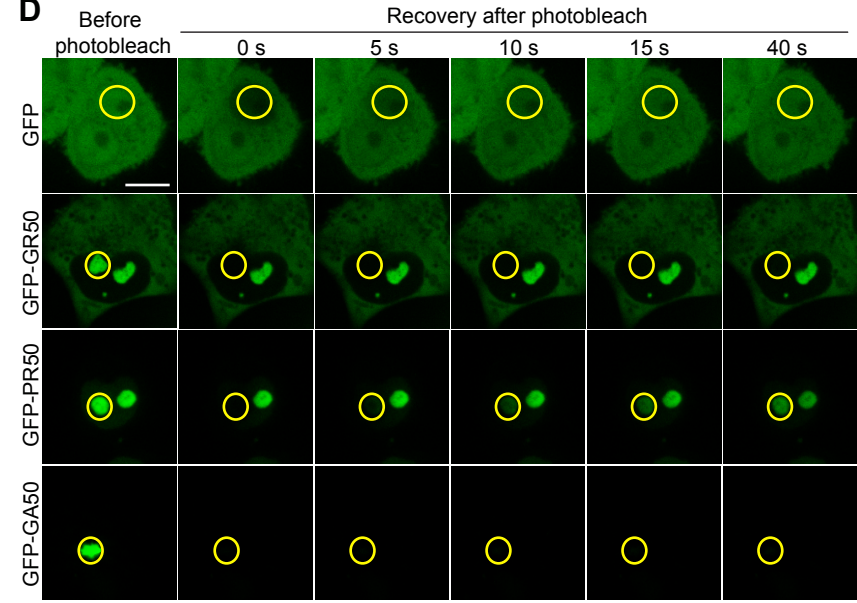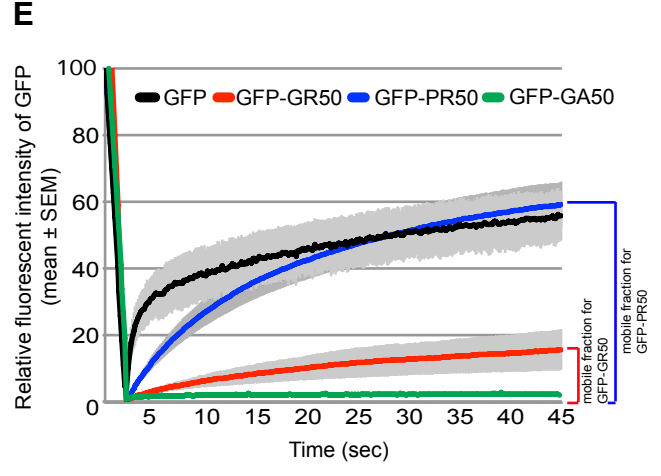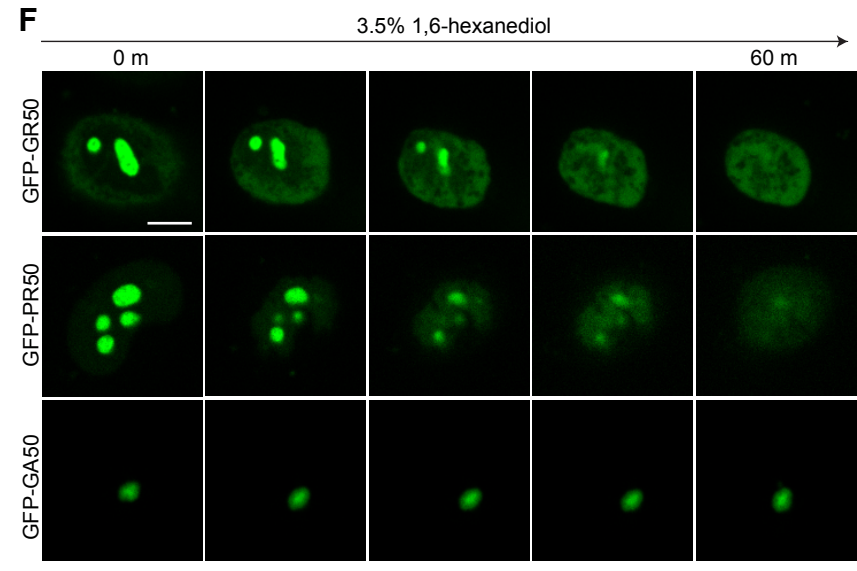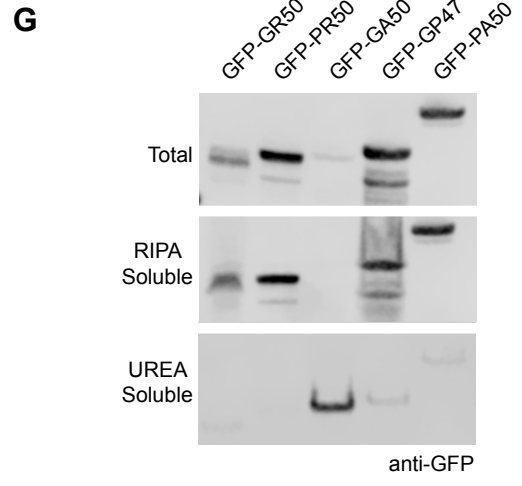

Supplementary Figure S3

Supplement: NIHMS821453-supplement-3.pdf [file NIHMS821453-supplement-3.pdf]

**A**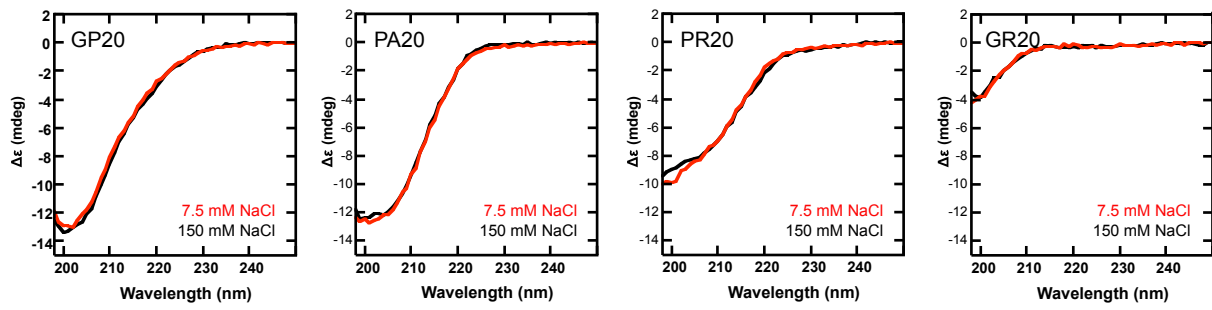**B**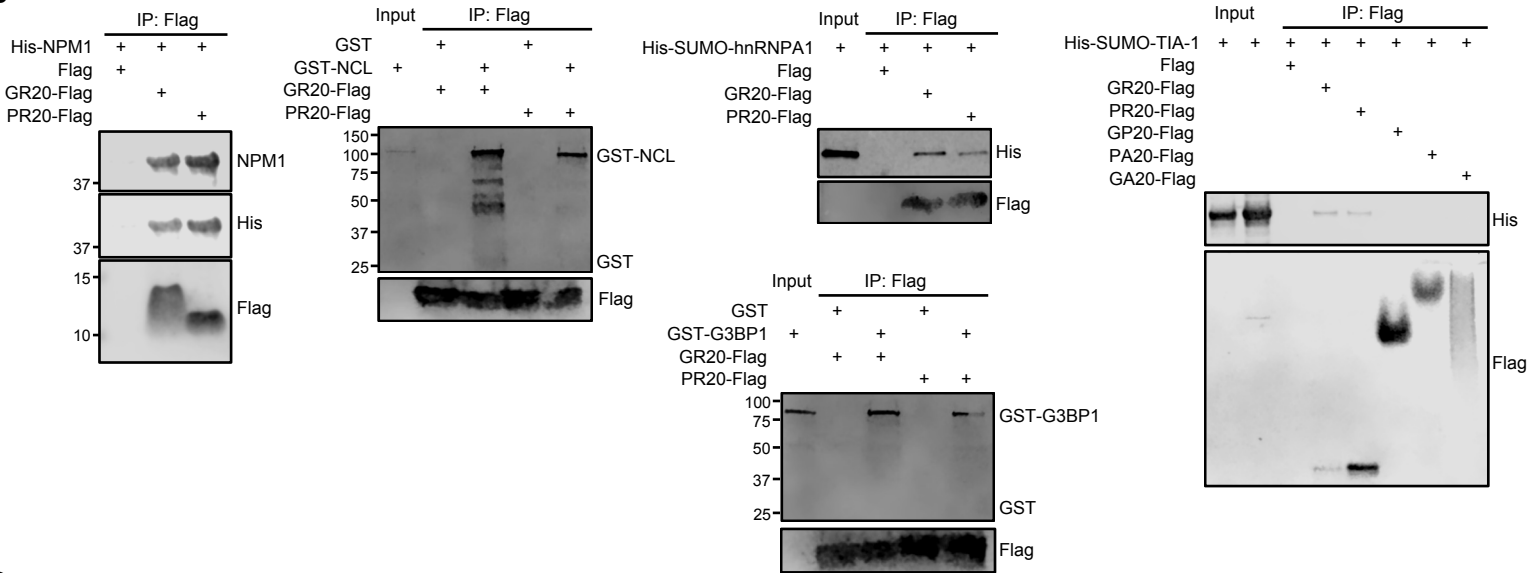**C**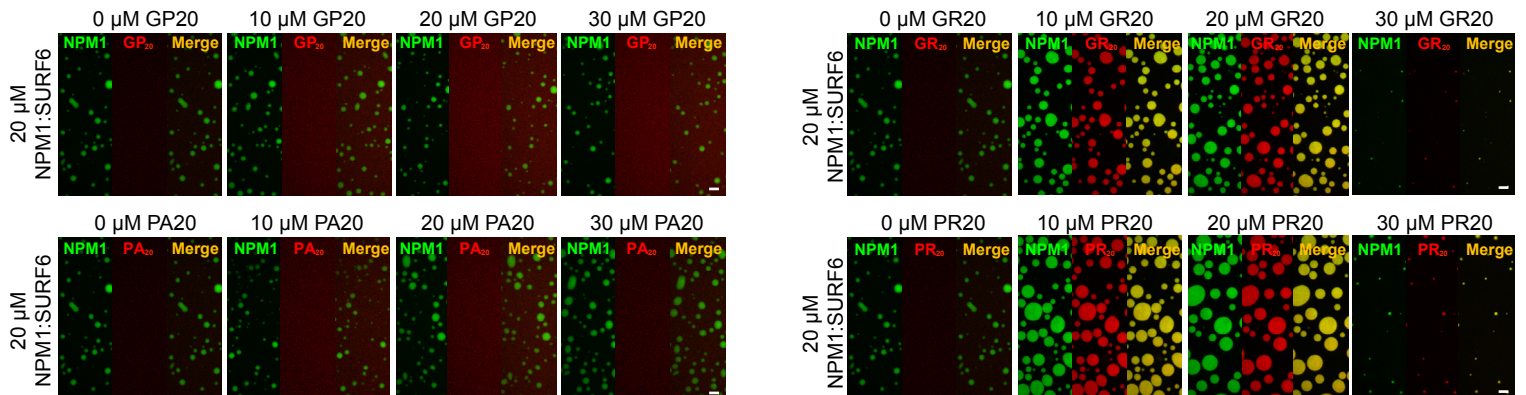**D**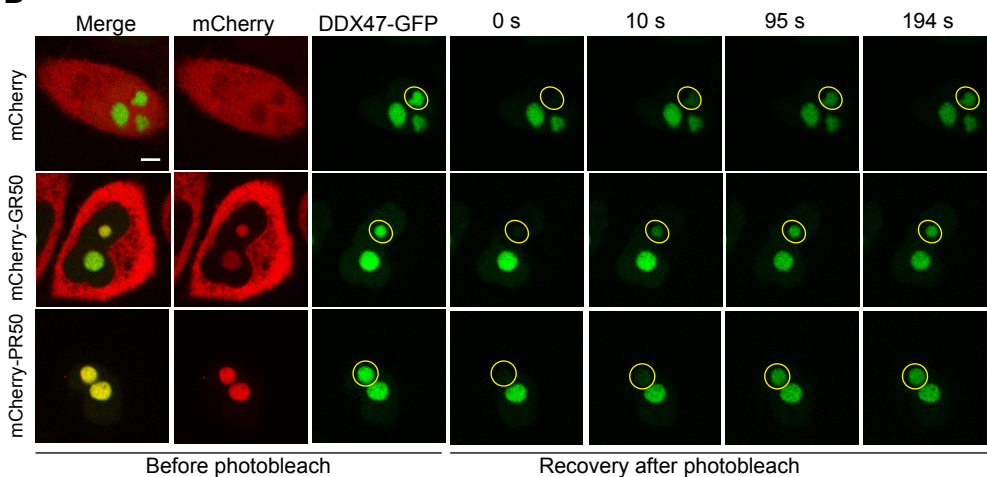**E**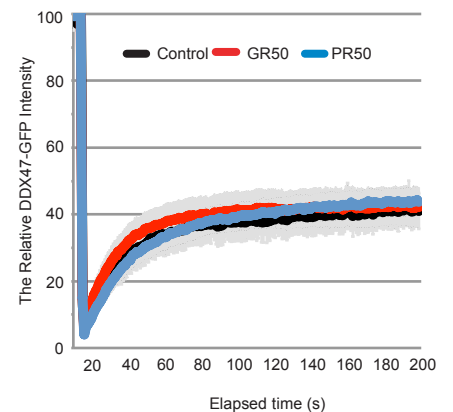

Supplement: NIHMS821453-supplement-4.pdf [file NIHMS821453-supplement-4.pdf]

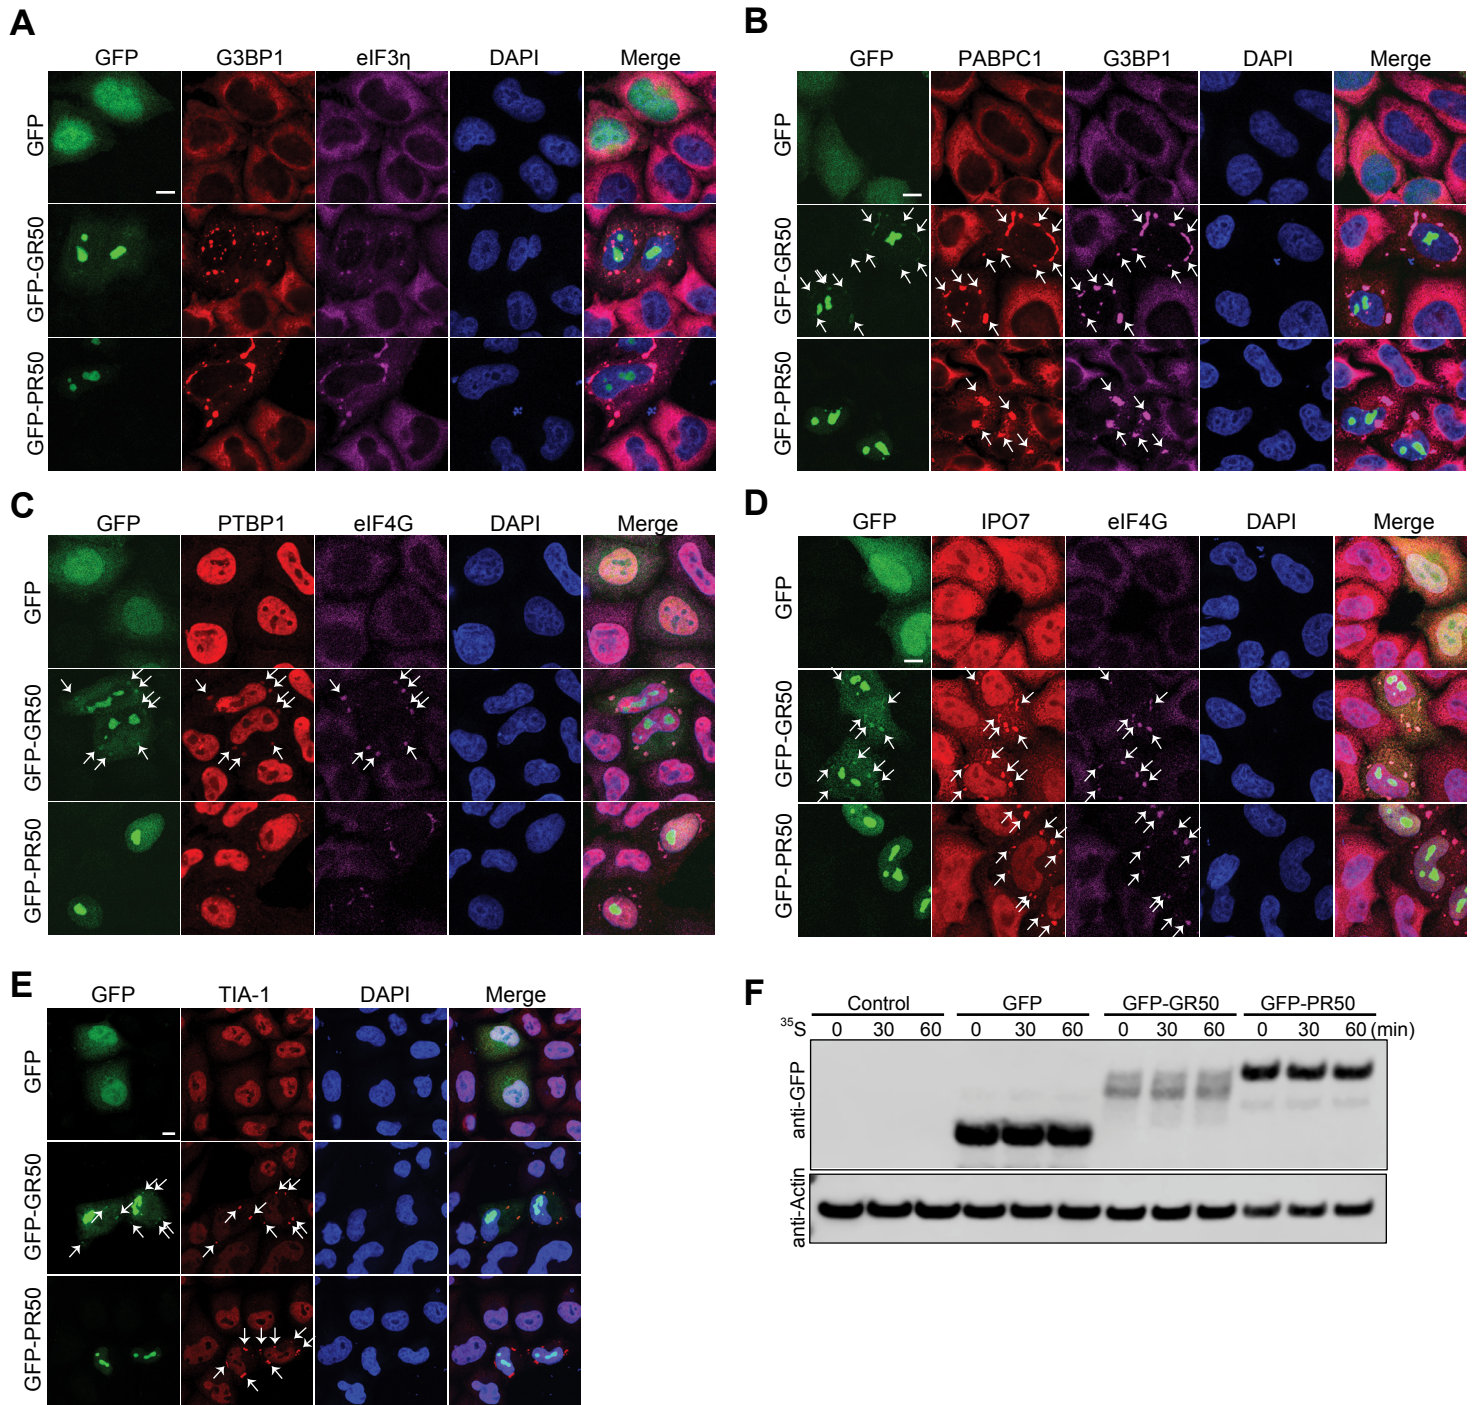

Supplementary Figure S5

Supplement: NIHMS821453-supplement-5.pdf [file NIHMS821453-supplement-5.pdf]

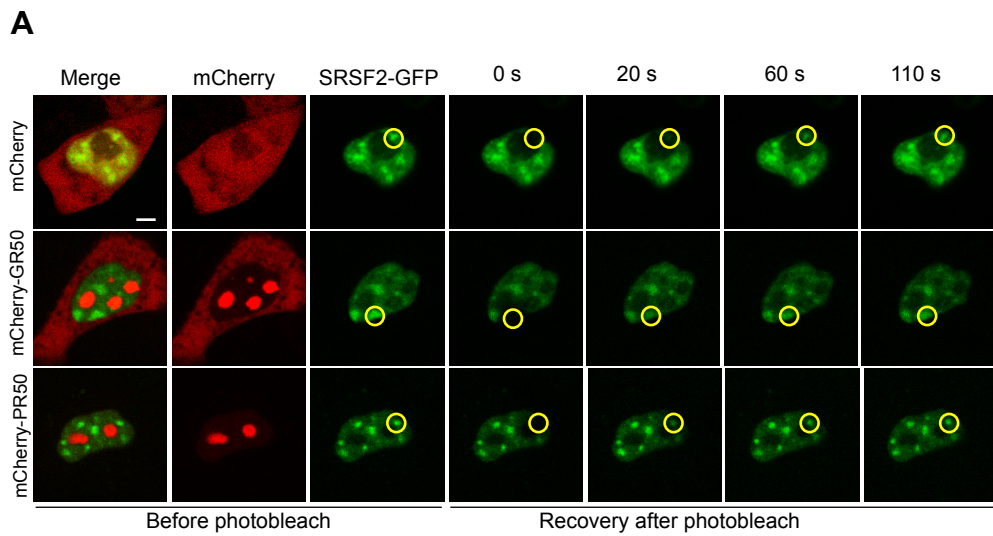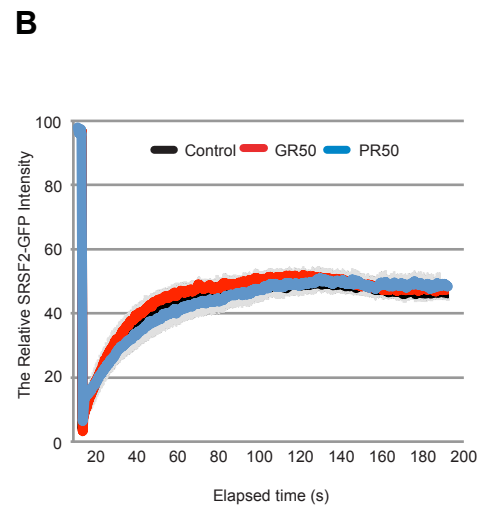

**Supplementary Figure S7**

Supplement: NIHMS821453-supplement-7.pdf [file NIHMS821453-supplement-7.pdf]
